# Supplementary material
Source: MDPI journal article supplement (https://www.mdpi.com/2072-4292/14/3/464)
Supplement: s1 [file s1]

# Tracking of Land Reclamation Activities Using Landsat Observations—An Example in Shanghai and Hangzhou Bay

Yuming Shi, Chengquan Huang, Shuo Shi and Jianya Gong

**Table S1.** IDs of used Landsat observations in this study.

|                                          |
|------------------------------------------|
| LT05_L1TP_118039_20110520_20161009_01_T1 |
| LT05_L1TP_118039_20101227_20161011_01_T1 |
| LT05_L1TP_118039_20101109_20161012_01_T1 |
| LT05_L1TP_118039_20091021_20161018_01_T1 |
| LT05_L1TP_118039_20090919_20161020_01_T1 |
| LT05_L1TP_118039_20090818_20161022_01_T1 |
| LT05_L1TP_118039_20090717_20161023_01_T1 |
| LT05_L1TP_118039_20090428_20161026_01_T1 |
| LT05_L1TP_118039_20080324_20161101_01_T1 |
| LT05_L1TP_118039_20070728_20161112_01_T1 |
| LT05_L1TP_118039_20070407_20161116_01_T1 |
| LT05_L1TP_118039_20070202_20161116_01_T1 |
| LT05_L1TP_118039_20060420_20161122_01_T1 |
| LT05_L1TP_118039_20060303_20161122_01_T1 |
| LT05_L1TP_118039_20051127_20161123_01_T1 |
| LT05_L1TP_118039_20040226_20170613_01_T1 |
| LT05_L1TP_118039_20031224_20161203_01_T1 |
| LT05_L1TP_118039_20031021_20161203_01_T1 |
| LT05_L1TP_118039_20030802_20161205_01_T1 |
| LT05_L1TP_118039_20021002_20161207_01_T1 |
| LT05_L1TP_118039_20020730_20161207_01_T1 |
| LT05_L1TP_118039_20020308_20161208_01_T1 |
| LT05_L1TP_118039_20011116_20161209_01_T1 |
| LT05_L1TP_118039_20011031_20161209_01_T1 |
| LT05_L1TP_118039_20010524_20161211_01_T1 |
| LT05_L1TP_118039_20000606_20161214_01_T1 |
| LT05_L1TP_118039_19990908_20161216_01_T1 |
| LT05_L1TP_118039_19990401_20161220_01_T1 |
| LT05_L1TP_118039_19990212_20161219_01_T1 |
| LT05_L1TP_118039_19980820_20161222_01_T1 |
| LT05_L1TP_118039_19980804_20161223_01_T1 |
| LT05_L1TP_118039_19980703_20161223_01_T1 |
| LT05_L1TP_118039_19980209_20161228_01_T1 |
| LT05_L1TP_118039_19971020_20161229_01_T1 |
| LT05_L1TP_118039_19970918_20161230_01_T1 |
| LT05_L1TP_118039_19970411_20170101_01_T1 |
| LT05_L1TP_118039_19961220_20170101_01_T1 |
| LT05_L1TP_118039_19961118_20170101_01_T1 |
| LT05_L1TP_118039_19960424_20170105_01_T1 |
| LT05_L1TP_118039_19951116_20170106_01_T1 |
| LT05_L1TP_118039_19950812_20170107_01_T1 |

---

|                                          |
|------------------------------------------|
| LT05_L1TP_118039_19950711_20170109_01_T1 |
| LT05_L1TP_118039_19950508_20170108_01_T1 |
| LT05_L1TP_118039_19950305_20170110_01_T1 |
| LT05_L1TP_118039_19940505_20170115_01_T1 |
| LT05_L1TP_118039_19940302_20180619_01_T1 |
| LT05_L1TP_118039_19931228_20170116_01_T1 |
| LT05_L1TP_118039_19930603_20170119_01_T1 |
| LT05_L1TP_118039_19930331_20170119_01_T1 |
| LT05_L1TP_118039_19920803_20170122_01_T1 |
| LT05_L1TP_118039_19920718_20170214_01_T1 |
| LT05_L1TP_118039_19920531_20170124_01_T1 |
| LT05_L1TP_118039_19911020_20170125_01_T1 |
| LT05_L1TP_118039_19910902_20170126_01_T1 |
| LT05_L1TP_118039_19910222_20170128_01_T1 |
| LT05_L1TP_118039_19900814_20170130_01_T1 |
| LT05_L1TP_118039_19900611_20170129_01_T1 |
| LT05_L1TP_118039_19900526_20170214_01_T1 |
| LT05_L1TP_118039_19891217_20170214_01_T1 |
| LT05_L1TP_118039_19891201_20170201_01_T1 |
| LT05_L1TP_118039_19891030_20170201_01_T1 |
| LT05_L1TP_118039_19890811_20170202_01_T1 |
| LT05_L1TP_118039_19881128_20170221_01_T1 |
| LT05_L1TP_118039_19881112_20170221_01_T1 |
| LT05_L1TP_118039_19880707_20170208_01_T1 |
| LT05_L1TP_118039_19880113_20170210_01_T1 |
| LE07_L1TP_118039_20121106_20161127_01_T1 |
| LE07_L1TP_118039_20120818_20161129_01_T1 |
| LE07_L1TP_118039_20120327_20161202_01_T1 |
| LE07_L1TP_118039_20111120_20161205_01_T1 |
| LE07_L1TP_118039_20110205_20161210_01_T1 |
| LE07_L1TP_118039_20100101_20161216_01_T1 |
| LE07_L1TP_118039_20090506_20161220_01_T1 |
| LE07_L1TP_118039_20090114_20161223_01_T1 |
| LE07_L1TP_118039_20080706_20161228_01_T1 |
| LE07_L1TP_118039_20080229_20161230_01_T1 |
| LE07_L1TP_118039_20070330_20170104_01_T1 |
| LE07_L1TP_118039_20070125_20170105_01_T1 |
| LE07_L1TP_118039_20070109_20170105_01_T1 |
| LE07_L1TP_118039_20060207_20170111_01_T1 |
| LE07_L1TP_118039_20050815_20170113_01_T1 |
| LE07_L1TP_118039_20031029_20170123_01_T1 |
| LE07_L1TP_118039_20021111_20170127_01_T1 |
| LE07_L1TP_118039_20020823_20170129_01_T1 |
| LE07_L1TP_118039_20020111_20170201_01_T1 |
| LE07_L1TP_118039_20011124_20170202_01_T1 |
| LE07_L1TP_118039_20010703_20170204_01_T1 |
| LE07_L1TP_118039_20010329_20170205_01_T1 |
| LE07_L1TP_118039_20010313_20170206_01_T1 |
| LE07_L1TP_118039_20001223_20170208_01_T1 |

---

---

|                                          |
|------------------------------------------|
| LE07_L1TP_118039_20000918_20170209_01_T1 |
| LE07_L1TP_118039_20000614_20170211_01_T1 |
| LE07_L1TP_118039_20000513_20170211_01_T1 |
| LE07_L1TP_118039_20000326_20170212_01_T1 |
| LC08_L1TP_118039_20180115_20180120_01_T1 |
| LC08_L1TP_118039_20170723_20170729_01_T1 |
| LC08_L1TP_118039_20170402_20180205_01_T1 |
| LC08_L1TP_118039_20170213_20170228_01_T1 |
| LC08_L1TP_118039_20160501_20170325_01_T1 |
| LC08_L1TP_118039_20160126_20170330_01_T1 |
| LC08_L1TP_118039_20150803_20180205_01_T1 |
| LC08_L1TP_118039_20150312_20180205_01_T1 |
| LC08_L1TP_118039_20141222_20170416_01_T1 |
| LC08_L1TP_118039_20141104_20170418_01_T1 |
| LC08_L1TP_118039_20131203_20170428_01_T1 |
| LC08_L1TP_118039_20131117_20170428_01_T1 |
| LC08_L1TP_118039_20130829_20170502_01_T1 |
| LC08_L1TP_118039_20130712_20170503_01_T1 |

---
